# Supplementary material for: Composite adverse outcomes in obstetric studies: a systematic review
Source: PubMed Central journal article supplement (PMC7863533; doi:10.1186/s12884-021-03588-w), 2021-02-05
Supplement: 12884_2021_3588_MOESM2_ESM.pdf [file 12884_2021_3588_MOESM2_ESM.pdf]

**Supplementary Data 2: Table of Included Studies – (with references)**

| <b>Year</b> | <b>Author (first author only)</b> | <b>Study Title / Topic / Condition</b>                                                                                                                     | <b>Type of Composite</b>              | <b>Primary or Secondary Outcome?</b> |
|-------------|-----------------------------------|------------------------------------------------------------------------------------------------------------------------------------------------------------|---------------------------------------|--------------------------------------|
| 2019        | Pels <sup>1</sup>                 | sildenafil versus placebo for pregnant women with severe early onset fetal growth restriction (STRIDER)                                                    | Perinatal                             | Primary                              |
| 2019        | Pasquier <sup>2</sup>             | Intentional early delivery versus expectant management for preterm premature rupture of membranes at 28-32 weeks' gestation (MICADO STUDY)                 | Perinatal                             | Primary                              |
| 2018        | Baqui <sup>3</sup>                | Prevalence of and risk factors for abnormal vaginal flora and its association with adverse pregnancy outcomes in a rural district in north-east Bangladesh | 1. Maternal - General<br>2. Perinatal | Primary                              |
| 2018        | Simon <sup>4</sup>                | Supplemental oxygen room air during planned caesarean delivery on umbilical cord gases                                                                     | 1. Maternal - General<br>2. Perinatal | Primary                              |
| 2018        | Simmons <sup>5</sup>              | Immediate treatment for GDM (intervention) or no treatment (control): Treatment of Booking Gestational diabetes Mellitus (TOBOGM)                          | Combined                              | Primary                              |
| 2018        | Venkateswaran <sup>6</sup>        | eRegQual-an electronic health registry with interactive checklists and clinical decision support for improving quality of antenatal care: protocol         | Combined                              | Primary                              |

## Supplementary Data 2: Table of Included Studies – (with references)

|      |                                   |                                                                                                                                                                                                             |                    |         |
|------|-----------------------------------|-------------------------------------------------------------------------------------------------------------------------------------------------------------------------------------------------------------|--------------------|---------|
| 2018 | Goldenberg <sup>7</sup>           | Routine antenatal ultrasound in low- and middle-income countries                                                                                                                                            | Combined           | Primary |
| 2018 | Luitjes <sup>8</sup>              | Innovative implementation strategy and feedback versus minimal implementation strategy of audit and feedback only.                                                                                          | Maternal - General | Primary |
| 2018 | Nathan <sup>9</sup>               | Evaluation of a novel device for the management of high blood pressure and shock in pregnancy in low-resource settings: protocol (CRADLE-3 trial)                                                           | Maternal - General | Primary |
| 2018 | Zaki <sup>10</sup>                | Comparison of staples vs subcuticular suture in class III obese women undergoing cesarean                                                                                                                   | Maternal - Wound   | Primary |
| 2018 | Scrafford <sup>11</sup>           | Effect of intra-operative glove changing during cesarean section on post-operative complications                                                                                                            | Maternal - Wound   | Primary |
| 2018 | Armstrong-Buisseret <sup>12</sup> | (ReMIT-2 protocol): standard care informed by placental growth factor (PIGF) blood test result versus standard care alone in women presenting with reduced fetal movement at or after 36+ 0 weeks gestation | Perinatal          | Primary |
| 2018 | Berry <sup>13</sup>               | insulin plus metformin versus insulin plus placebo for the treatment of type 2 diabetes complicating pregnancy (MOMPOD) study                                                                               | Perinatal          | Primary |

## Supplementary Data 2: Table of Included Studies – (with references)

|      |                            |                                                                                                                                                                  |           |         |
|------|----------------------------|------------------------------------------------------------------------------------------------------------------------------------------------------------------|-----------|---------|
| 2018 | Norman <sup>14</sup>       | no pessary vs (Arabin) pessary to prevent preterm birth in twin pregnancy with health economics and acceptability: STOPPIT-2-a protocol                          | Perinatal | Primary |
| 2018 | Chappell <sup>15</sup>     | Ursodeoxycholic acid versus placebo in the treatment of women with intrahepatic cholestasis of pregnancy (ICP) to improve perinatal outcomes: Protocol (PITCHES) | Perinatal | Primary |
| 2018 | Subtil <sup>16</sup>       | single-course or triple-course clindamycin for bacterial vaginosis in pregnancy (PREMEVA)                                                                        | Perinatal | Primary |
| 2018 | Brocklehurst <sup>17</sup> | Computerised interpretation of the fetal heart rate during labour: Decision support or no decision support (INFANT)                                              | Perinatal | Primary |
| 2018 | Hermans <sup>18</sup>      | Cervical pessary vs no pessary after arrested preterm labor                                                                                                      | Perinatal | Primary |
| 2018 | Cahill <sup>19</sup>       | Immediate vs Delayed Pushing on Rates of Spontaneous Vaginal Delivery among Nulliparous Women Receiving Neuraxial Analgesia                                      | Perinatal | Primary |
| 2018 | Dugoff <sup>20</sup>       | Prevention of preterm birth with pessary vs no pessary in singletons (PoPPS):                                                                                    | Perinatal | Primary |
| 2018 | Blackwell <sup>21</sup>    | PROLONG Clinical Hydroxyprogesterone Caproate to Reduce Recurrent Preterm Birth                                                                                  | Perinatal | Primary |

**Supplementary Data 2: Table of Included Studies – (with references)**

|      |                       |                                                                                                                                                                      |                                                                |                       |
|------|-----------------------|----------------------------------------------------------------------------------------------------------------------------------------------------------------------|----------------------------------------------------------------|-----------------------|
| 2018 | Grobman <sup>22</sup> | Labor induction versus expectant management in low-risk nulliparous women                                                                                            | Perinatal                                                      | Primary               |
| 2018 | Senat <sup>23</sup>   | Effect of Glyburide vs subcutaneous insulin on perinatal complications among women with gestational diabetes                                                         | Perinatal                                                      | Primary               |
| 2018 | Balogun <sup>24</sup> | Serial Third-Trimester Ultrasonography Compared With Routine Care in Uncomplicated Pregnancies                                                                       | 1. Maternal - General<br>2. Maternal - General<br>3. Perinatal | Primary and Secondary |
| 2018 | Norman <sup>25</sup>  | progesterone prophylaxis vs placebo to prevent preterm labour improve outcome? A randomised double-blind placebo-controlled trial (OPPTIMUM)                         | 1. Perinatal<br>2. Perinatal                                   | Primary and Secondary |
| 2018 | Price <sup>26</sup>   | Health consequences for mother and baby of substantial vs modest pre-conception weight loss in obese women: protocol                                                 | Combined                                                       | secondary             |
| 2018 | Wihbey <sup>27</sup>  | Prophylactic negative pressure therapy compared with standard surgical dressings on Wound Complication after Cesarean Delivery in Women with Class II or III Obesity | Maternal - Wound                                               | Secondary             |
| 2017 | Bardou <sup>28</sup>  | NAITRE- effect of conditional cash transfer on poor pregnancy outcomes in underprivileged women: Protocol                                                            | Combined                                                       | Primary               |

**Supplementary Data 2: Table of Included Studies – (with references)**

|      |                          |                                                                                                                                                                                                        |                    |         |
|------|--------------------------|--------------------------------------------------------------------------------------------------------------------------------------------------------------------------------------------------------|--------------------|---------|
| 2017 | Schreiber <sup>29</sup>  | (HYPATIA) Protocol: Hydroxychloroquine versus Placebo in Addition to Standard Treatment in Pregnant Women with Antiphospholipid Syndrome or Antibodies                                                 | Combined           | Primary |
| 2017 | Fransen <sup>30</sup>    | Simulation-based team training for multi-professional obstetric care teams to improve patient outcome:                                                                                                 | Combined           | Primary |
| 2017 | Linden <sup>31</sup>     | Pelvic Examination vs no pelvic examination in Patients Presenting to the Emergency Department With Vaginal Bleeding or Abdominal Pain When an Intrauterine Pregnancy Is Identified on Ultrasonography | Maternal - General | Primary |
| 2017 | Ruhstaller <sup>32</sup> | Prophylactic Wound Vacuum Therapy vs standard wound care after Cesarean Section to Prevent Wound Complications in the Obese Population: A (the ProVac Study)                                           | Maternal - Wound   | Primary |
| 2017 | Pasquier <sup>33</sup>   | A cluster-randomized trial to reduce major perinatal morbidity among women with one prior cesarean delivery in Quebec (PRISMA trial): protocol                                                         | Perinatal          | Primary |
| 2017 | van Zijl <sup>34</sup>   | Pessary or Progesterone to Prevent Preterm delivery in women with short cervical length: The Quadruple P                                                                                               | Perinatal          | Primary |

**Supplementary Data 2: Table of Included Studies – (with references)**

|      |                         |                                                                                                                                                                                        |                  |                       |
|------|-------------------------|----------------------------------------------------------------------------------------------------------------------------------------------------------------------------------------|------------------|-----------------------|
| 2017 | Berghella <sup>35</sup> | Bioteque™ cup cervical pessary or no pessary for prevention of preterm birth with pessary in twins (PoPPT)                                                                             | Perinatal        | Primary               |
| 2017 | Dodd <sup>36</sup>      | Fetal middle cerebral artery Doppler to time second and subsequent intrauterine transfusions to treat anaemia due to red cell allo-immunisation                                        | Perinatal        | Primary               |
| 2017 | Semrau <sup>37</sup>    | Outcomes of a coaching-based WHO safe childbirth checklist program in India                                                                                                            | Combined         | Primary and Secondary |
| 2017 | Groom <sup>38</sup>     | standard high-risk care or standard high-risk care plus enoxaparin for the prevention of preeclampsia and intrauterine growth restriction in women with a history                      | Combined         | Primary and Secondary |
| 2017 | Springel <sup>39</sup>  | chlorhexidine-alcohol versus povidone-iodine for cesarean antisepsis                                                                                                                   | Maternal - Wound | Secondary             |
| 2017 | Koullali <sup>40</sup>  | cervical pessary or cervical cerclage in the prevention of preterm delivery in women with short cervical length and a history of preterm birth - PC study                              | Perinatal        | Secondary             |
| 2017 | Rodo <sup>41</sup>      | Arabin cervical pessary vs expectant management for prevention of preterm birth in cases of twin-to-twin transfusion syndrome treated by fetoscopic LASER coagulation: The PECEP LASER | Perinatal        | Secondary             |

**Supplementary Data 2: Table of Included Studies – (with references)**

|      |                          |                                                                                                                                                         |                                                |           |
|------|--------------------------|---------------------------------------------------------------------------------------------------------------------------------------------------------|------------------------------------------------|-----------|
| 2017 | Visser <sup>42</sup>     | Low dose aspirin vs placebo in the prevention of recurrent spontaneous preterm labour - the APRIL study                                                 | Perinatal                                      | Secondary |
| 2017 | Crowther <sup>43</sup>   | Vaginal progesterone pessaries for pregnant women with a previous preterm birth to prevent neonatal respiratory distress syndrome (the PROGRESS Study)  | Perinatal                                      | Secondary |
| 2017 | Connolly <sup>44</sup>   | simultaneous (oxytocin and Foley balloon) or sequential (oxytocin after the expulsion of Foley balloon) induction of Labor Trial in Multiparas (FIAT-M) | Perinatal                                      | Secondary |
| 2016 | Wattar <sup>45</sup>     | Effect of simple, targeted diet in pregnant women with metabolic risk factors on maternal and fetal outcomes (ESTEEM): protocol                         | 1. Maternal - General<br>2. Perinatal          | Primary   |
| 2016 | Barasinski <sup>46</sup> | Effect of the type of maternal pushing during the second stage of labour on obstetric and neonatal outcome: The EOLE protocol                           | 1. Maternal - General<br>2. Maternal - General | Primary   |
| 2016 | Salim <sup>47</sup>      | Adjusting enoxaparin dosage according to anti-fxa levels vs 40 mg daily enoxaparin nonpregnancy outcome in thrombophilic women                          | Combined                                       | Primary   |
| 2016 | Feig <sup>48</sup>       | Metformin or placebo in women with type 2 diabetes in pregnancy (MiTy)                                                                                  | Combined                                       | Primary   |

## Supplementary Data 2: Table of Included Studies – (with references)

|      |                               |                                                                                                                                                                                                                         |                    |         |
|------|-------------------------------|-------------------------------------------------------------------------------------------------------------------------------------------------------------------------------------------------------------------------|--------------------|---------|
| 2016 | Kimani <sup>49</sup>          | azithromycin-chloroquine versus sulfadoxine-pyrimethamine for intermittent preventive treatment of plasmodium falciparum malaria infection in pregnant women in Africa                                                  | Combined           | Primary |
| 2016 | Haddad <sup>50</sup>          | Enoxaparin and Aspirin Compared with Aspirin Alone to Prevent Placenta-Mediated Pregnancy Complications                                                                                                                 | Combined           | Primary |
| 2016 | Madanitsa <sup>51</sup>       | Scheduled Intermittent Screening with Rapid Diagnostic Tests and Treatment with Dihydroartemisinin-Piperaquine versus Intermittent Preventive Therapy with Sulfadoxine-Pyrimethamine for Malaria in Pregnancy in Malawi | Combined           | Primary |
| 2016 | McCarthy <sup>52</sup>        | Self-weighing and simple dietary advice for overweight and obese pregnant women to reduce obstetric complications without impact on quality of life                                                                     | Maternal - General | Primary |
| 2016 | Ducloy-Bouthors <sup>53</sup> | Fibrinogen concentrate vs placebo for postpartum haemorrhage-induced coagulopathy: protocol (FIDEL)                                                                                                                     | Maternal - Wound   | Primary |
| 2016 | Duggal <sup>54</sup>          | Perioperative Oxygen Supplementation and Surgical Site Infection After Cesarean Delivery                                                                                                                                | Maternal - Wound   | Primary |
| 2016 | Van Vliet <sup>55</sup>       | Nifedipine versus atosiban for threatened preterm birth (APOSTEL III)                                                                                                                                                   | Perinatal          | Primary |



**Supplementary Data 2: Table of Included Studies – (with references)**

|      |                                |                                                                                                                                                                                                                                                             |           |         |
|------|--------------------------------|-------------------------------------------------------------------------------------------------------------------------------------------------------------------------------------------------------------------------------------------------------------|-----------|---------|
| 2016 | Norman <sup>56</sup>           | Vaginal progesterone prophylaxis for preterm birth (the OPPTIMUM study)                                                                                                                                                                                     | Perinatal | Primary |
| 2016 | Eikelder <sup>57</sup>         | Induction of labour at term with oral misoprostol versus a Foley catheter (PROBAAT-II):                                                                                                                                                                     | Combined  | Primary |
| 2016 | Murphy <sup>58</sup>           | The Breathing for Life Trial: A of fractional exhaled nitric oxide (FENO)-based management of asthma vs clinical assessment and self-management education during pregnancy and its impact on perinatal outcomes and infant and childhood respiratory health | Perinatal | Primary |
| 2016 | D'Angelo <sup>59</sup>         | High dose antithrombin supplementation vs placebo in early preeclampsia                                                                                                                                                                                     | Perinatal | Primary |
| 2016 | Nijman <sup>60</sup>           | Nifedipine versus placebo in the treatment of preterm pre-labor rupture of membranes (APOSTEL IV)                                                                                                                                                           | Perinatal | Primary |
| 2016 | Gyamfi-Bannerman <sup>61</sup> | Antenatal betamethasone vs placebo for women at risk for late preterm delivery                                                                                                                                                                              | Perinatal | Primary |
| 2016 | Elden <sup>62</sup>            | protocol of SWEPIs- to compare induction of labour at 41 completed gestational weeks versus expectant management and induction at 42 completed gestational weeks                                                                                            | Perinatal | Primary |

## Supplementary Data 2: Table of Included Studies – (with references)

|      |                          |                                                                                                                                                                      |                                                                                |                       |
|------|--------------------------|----------------------------------------------------------------------------------------------------------------------------------------------------------------------|--------------------------------------------------------------------------------|-----------------------|
| 2016 | Fang <sup>63</sup>       | Effects of quercetin and melatonin in pregnant and gestational diabetic women                                                                                        | Perinatal                                                                      | Primary               |
| 2016 | Garcia <sup>64</sup>     | Do knowledge of uterine artery resistance in the second trimester and targeted surveillance improve maternal and perinatal outcome? UTOPIA study                     | 1. Maternal - General<br>2. Combined                                           | Primary and Secondary |
| 2016 | Henrichs <sup>65</sup>   | Effectiveness and cost-effectiveness of routine third trimester ultrasound screening for intrauterine growth restriction: protocol (The IRIS Study)                  | 1. Maternal - General<br>2. Maternal - General<br>3. Perinatal                 | Primary and Secondary |
| 2016 | Tita <sup>66</sup>       | Adjunctive azithromycin prophylaxis vs placebo for cesarean delivery                                                                                                 | 1. Maternal - General<br>2. Maternal - General<br>3. Perinatal<br>4. Perinatal | Primary and Secondary |
| 2016 | Widmer <sup>67</sup>     | Room temperature stable carbetocin vs oxytocin for the prevention of postpartum haemorrhage during the third stage of labour in women delivering vaginally: protocol | Maternal - General                                                             | Primary and Secondary |
| 2016 | Kakuru <sup>68</sup>     | Dihydroartemisinin-piperaquine for the prevention of malaria in pregnancy                                                                                            | Combined                                                                       | Secondary             |
| 2016 | Nicolaides <sup>69</sup> | Cervical pessary placement for prevention of preterm birth in unselected twin pregnancies:                                                                           | Perinatal                                                                      | Secondary             |

## Supplementary Data 2: Table of Included Studies – (with references)

|      |                            |                                                                                                                                                                                      |                    |           |
|------|----------------------------|--------------------------------------------------------------------------------------------------------------------------------------------------------------------------------------|--------------------|-----------|
| 2016 | Hezelgrave <sup>70</sup>   | design of SuPPoRT:to compare three treatments: Cervical cerclage, cervical pessary and vaginal progesterone, for the prevention of preterm birth in women who develop a short cervix | Perinatal          | Secondary |
| 2016 | Hermans <sup>71</sup>      | Effectiveness of a cervical pessary for women who did t deliver 48 h after threatened preterm labor (Apostel VI)                                                                     | Perinatal          | Secondary |
| 2016 | Goya <sup>72</sup>         | Cervical pessary vs expectant management to prevent preterm birth in women with twin gestation and so graphic short cervix: A multicenter (PECEP-Twins)                              | Perinatal          | Secondary |
| 2016 | Morris <sup>73</sup>       | Immediate delivery compared with expectant management after preterm pre-labour rupture of the membranes close to term (PPROMT trial):                                                | Perinatal          | Secondary |
| 2016 | Connolly <sup>74</sup>     | A randomized trial of Foley balloon induction of labor trial in nulliparas (FIAT-N)                                                                                                  | Perinatal          | Secondary |
| 2015 | Equy <sup>75</sup>         | Clinical impact of the disposable ventouse iCup versus a metallic vacuum cup                                                                                                         | Combined           | Primary   |
| 2015 | Broekhuijsen <sup>76</sup> | Immediate delivery versus expectant monitoring for hypertensive disorders of pregnancy between 34                                                                                    | Maternal - General | Primary   |

**Supplementary Data 2: Table of Included Studies – (with references)**

|      |                        |                                                                                                                                                        |           |         |
|------|------------------------|--------------------------------------------------------------------------------------------------------------------------------------------------------|-----------|---------|
|      |                        | and 37 weeks of gestation (HYPITAT-II)                                                                                                                 |           |         |
| 2015 | Boulvain <sup>77</sup> | Induction of labour versus expectant management for large-for-date fetuses                                                                             | Perinatal | Primary |
| 2015 | Van Os <sup>78</sup>   | Preventing Preterm Birth with Progesterone in Women with a Short Cervical Length from a Low-Risk Population                                            | Perinatal | Primary |
| 2015 | Hammad <sup>79</sup>   | Uncomplicated Pregnancies- third trimester ultrasonographic exams versus routine prenatal care ) to improve the detection of small for gestational age | Perinatal | Primary |
| 2015 | George <sup>80</sup>   | Comparison of neonatal outcomes in women with gestational diabetes with moderate hyperglycaemia on metformin or glibenclamide                          | Perinatal | Primary |
| 2015 | Awwad <sup>81</sup>    | 17-hydroxyprogesterone caproate vs placebo for the prevention of preterm birth in twin gestation (PROGESTWIN)                                          | Perinatal | Primary |
| 2015 | Belfort <sup>82</sup>  | "open" or "masked" monitoring with fetal ST-segment analysis                                                                                           | Perinatal | Primary |

**Supplementary Data 2: Table of Included Studies – (with references)**

|      |                      |                                                                                                                                                                                                                                                    |                                                       |                       |
|------|----------------------|----------------------------------------------------------------------------------------------------------------------------------------------------------------------------------------------------------------------------------------------------|-------------------------------------------------------|-----------------------|
| 2015 | Desai <sup>83</sup>  | Intermittent screening and treatment or intermittent preventive treatment with dihydroartemisinin-piperaquine versus intermittent preventive treatment with sulfadoxine-pyrimethamine for the control of malaria during pregnancy in western Kenya | Perinatal                                             | Primary and Secondary |
| 2015 | Cluver <sup>84</sup> | Double blind, randomised, placebo controlled trial to evaluate the efficacy of esomeprazole to treat early onset pre-eclampsia (PIE Trial): A protocol                                                                                             | 1. Maternal - General<br>2. Perinatal<br>3. Perinatal | Secondary             |
| 2015 | Combs <sup>85</sup>  | 17-hydroxyprogesterone caproate vs placebo for preterm rupture of the membranes                                                                                                                                                                    | Perinatal                                             | Secondary             |
| 2015 | Brizot <sup>86</sup> | Vaginal progesterone vs placebo for the prevention of preterm birth in twin gestations                                                                                                                                                             | Perinatal                                             | Secondary             |
| 2014 | Alves <sup>87</sup>  | BRAMAG trial: Oral magnesium supplementation in pregnancy for the prevention of preterm birth and perinatal and maternal morbidity                                                                                                                 | 1. Maternal - General<br>2. Perinatal                 | Primary               |
| 2014 | Rodger <sup>88</sup> | Antepartum dalteparin versus no antepartum dalteparin for the prevention of pregnancy complications in pregnant women with thrombophilia (TIPPS)                                                                                                   | Combined                                              | Primary               |

## Supplementary Data 2: Table of Included Studies – (with references)

|      |                         |                                                                                                                                  |                  |         |
|------|-------------------------|----------------------------------------------------------------------------------------------------------------------------------|------------------|---------|
| 2014 | McClure <sup>89</sup>   | ultrasound to improve pregnancy outcomes in low income country settings                                                          | Combined         | Primary |
| 2014 | MacKeen <sup>90</sup>   | Suture compared with staple skin closure after cesarean delivery                                                                 | Maternal - Wound | Primary |
| 2014 | Esmer <sup>91</sup>     | subcutaneous closure vs non-subcut closure in preventing wound complications after cesarean delivery with Pfannenstiel incision: | Maternal - Wound | Primary |
| 2014 | Liem <sup>92</sup>      | Cervical pessaries for prevention of preterm birth in women with a multiple pregnancy (ProTWIN): , open-label                    | Perinatal        | Primary |
| 2014 | Barrett <sup>93</sup>   | planned cesarean or vaginal delivery for twin pregnancy                                                                          | Perinatal        | Primary |
| 2014 | Schmitz <sup>94</sup>   | Outpatient cervical ripening by nitric oxide donors vs placebo for prolonged pregnancy                                           | Perinatal        | Primary |
| 2014 | Slaghekke <sup>95</sup> | Fetoscopic laser coagulation of the vascular equator versus selective coagulation for twin-to-twin transfusion syndrome          | Perinatal        | Primary |
| 2014 | Kamat <sup>96</sup>     | Comparison of nifedipine and progesterone for maintenance tocolysis after arrested preterm labour                                | Perinatal        | Primary |

## Supplementary Data 2: Table of Included Studies – (with references)

|      |                                                           |                                                                                                              |                    |           |
|------|-----------------------------------------------------------|--------------------------------------------------------------------------------------------------------------|--------------------|-----------|
| 2014 | Galyean <sup>97</sup>                                     | Removal versus retention of cerclage in preterm premature rupture of membranes                               | Perinatal          | Secondary |
| 2013 | Ayala <sup>98</sup>                                       | Chronotherapy with low-dose aspirin for prevention of complications in pregnancy                             | Combined           | Primary   |
| 2013 | Glavind <sup>99</sup>                                     | Elective caesarean section at 38 weeks versus 39 weeks: Neonatal and maternal outcomes                       | Maternal - General | Primary   |
| 2013 | CORONIS Collaborative Group (Brocklehurst) <sup>100</sup> | Caesarean section surgical techniques (CORONIS)                                                              | Maternal - General | Primary   |
| 2013 | Figuroa <sup>101</sup>                                    | Surgical staples compared with subcuticular suture for skin closure after cesarean delivery                  | Maternal - Wound   | Primary   |
| 2013 | Francis <sup>102</sup>                                    | Timing of prophylactic antibiotic at cesarean section: A double-blinded, randomized trial                    | Maternal - Wound   | Primary   |
| 2013 | Roos <sup>103</sup>                                       | effect of maintenance tocolysis with nifedipine vs placebo in threatened preterm labor on perinatal outcomes | Perinatal          | Primary   |
| 2013 | Heazell <sup>104</sup>                                    | standard or intensive management of reduced fetal movements after 36 weeks gestation-feasibility study       | Perinatal          | Primary   |

**Supplementary Data 2: Table of Included Studies – (with references)**

|      |                                |                                                                                                                                                                       |                                       |           |
|------|--------------------------------|-----------------------------------------------------------------------------------------------------------------------------------------------------------------------|---------------------------------------|-----------|
| 2013 | Kwak <sup>105</sup>            | The efficacy of cefazolin plus macrolide (erythromycin or clarithromycin) versus cefazolin alone in neonatal morbidity and placental inflammation for women with PPRM | Perinatal                             | Primary   |
| 2013 | Nuthalapaty <sup>106</sup>     | A RCT of early versus delayed skin staple removal following caesarean section in the obese patient                                                                    | Maternal - Wound                      | Secondary |
| 2013 | Crowther <sup>107</sup>        | Magnesium sulphate at 30 to 34 weeks' gestational age vs placebo: Neuroprotection trial (MAGENTA) - protocol                                                          | Perinatal                             | Secondary |
| 2013 | Vigil-De Gracia <sup>108</sup> | steroids with prompt delivery after 48 hours vs steroids and expectant managements for severe preeclampsia remote from term: The MEXPRE Latin Study,                  | Perinatal                             | Secondary |
| 2012 | Seal <sup>109</sup>            | Cesarean or vaginal delivery on maternal and perinatal outcome in women with eclampsia? A randomized controlled pilot study                                           | 1. Maternal - General<br>2. Perinatal | Primary   |
| 2012 | Martinelli <sup>110</sup>      | Heparin vs medical surveillance alone in pregnant women with previous placenta-mediated pregnancy complications                                                       | Combined                              | Primary   |



**Supplementary Data 2: Table of Included Studies – (with references)**

|      |                          |                                                                                                                                                                                                                                                 |                    |                       |
|------|--------------------------|-------------------------------------------------------------------------------------------------------------------------------------------------------------------------------------------------------------------------------------------------|--------------------|-----------------------|
| 2012 | Dioulasso <sup>111</sup> | Maternal HIV-1 disease progression 18-24 months postdelivery according to antiretroviral prophylaxis regimen (triple-antiretroviral prophylaxis during pregnancy and breastfeeding vs zidovudine/single-dose nevirapine prophylaxis):kesho bora | Maternal - General | Primary               |
| 2012 | Grobman <sup>112</sup>   | 17 alpha-hydroxyprogesterone caproate vs placebo to prevent prematurity in nulliparas with cervical length less than 30 mm                                                                                                                      | Perinatal          | Primary               |
| 2012 | Dodd <sup>113</sup>      | Elective birth at 37 weeks of gestation versus standard care for women with an uncomplicated twin pregnancy at term: The Twins Timing of Birth Trial                                                                                            | Perinatal          | Primary               |
| 2012 | Norman <sup>114</sup>    | Trial protocol OPPTIMUM- Does progesterone prophylaxis for the prevention of preterm labour improve outcome?                                                                                                                                    | Perinatal          | Primary and Secondary |
| 2011 | Gris <sup>115</sup>      | Addition of enoxaparin to aspirin for the Secondary prevention of placental vascular complications in women with severe pre-eclampsia: NOH-PE trial                                                                                             | Combined           | Primary               |
| 2011 | Gris <sup>116</sup>      | enoxaparin for the Secondary prevention of placental vascular complications in women with previous severe pre-eclampsia: NOH-PE study                                                                                                           | Combined           | Primary               |

**Supplementary Data 2: Table of Included Studies – (with references)**

|      |                        |                                                                                                                           |                    |         |
|------|------------------------|---------------------------------------------------------------------------------------------------------------------------|--------------------|---------|
| 2011 | Scifres <sup>117</sup> | Supplemental oxygen (nasal cannula vs non-rebreathe) for the prevention of post cesarean infectious morbidity             | Maternal - General | Primary |
| 2011 | Boers <sup>118</sup>   | Induction versus expectant monitoring for intrauterine growth restriction at term: Randomised equivalence trial (DIGITAT) | Perinatal          | Primary |
| 2011 | Combs <sup>119</sup>   | 17-hydroxyprogesterone caproate vs placebo for twin pregnancy                                                             | Perinatal          | Primary |
| 2011 | Lim <sup>120</sup>     | 17alpha-hydroxyprogesterone caproate vs placebo for the prevention of adverse neonatal outcome in multiple pregnancies:   | Perinatal          | Primary |
| 2011 | Combs <sup>121</sup>   | 17-Hydroxyprogesterone caproate vs placebo to prolong pregnancy after preterm rupture of the membranes                    | Perinatal          | Primary |
| 2010 | Haas <sup>122</sup>    | Vaginal cleansing vs. no cleaning before cesarean delivery to reduce postoperative infectious morbidity                   | Maternal - General | Primary |
| 2010 | Vanky <sup>123</sup>   | Metformin Versus placebo from first trimester to delivery in polycystic ovary syndrome                                    | Combined           | Primary |
| 2010 | Basha <sup>124</sup>   | wound complication rates of subcuticular suture vs staples for skin closure at cesarean delivery                          | Maternal - Wound   | Primary |

**Supplementary Data 2: Table of Included Studies – (with references)**

|      |                         |                                                                                                                                               |                                      |           |
|------|-------------------------|-----------------------------------------------------------------------------------------------------------------------------------------------|--------------------------------------|-----------|
| 2010 | Combs <sup>125</sup>    | Failure of 17-hydroxyprogesterone to reduce neonatal morbidity or prolong triplet pregnancy                                                   | Perinatal                            | Primary   |
| 2010 | Macones <sup>126</sup>  | scaling and root planning (active) or tooth polishing (control) on occurrence of preterm birth: (PIPS)                                        | 1. Maternal - Wound<br>2. Perinatal  | Secondary |
| 2009 | Nassar <sup>127</sup>   | Two dose regimens of nifedipine for management of preterm labor                                                                               | 1. Maternal -General<br>2. Perinatal | Primary   |
| 2009 | Landon <sup>128</sup>   | usual prenatal care or dietary intervention, self-monitoring of BM, and insulin therapy, if necessary for mild gestational diabetes           | Combined                             | Primary   |
| 2009 | Rey <sup>129</sup>      | Dalteparin vs. no dalteparin for the prevention of recurrence of placental-mediated complications of pregnancy in women without thrombophilia | Combined                             | Primary   |
| 2009 | Koopmans <sup>130</sup> | Induction of labour versus expectant monitoring for gestational hypertension or mild pre-eclampsia after 36 weeks' gestation (HYPITAT):       | Maternal - General                   | Primary   |
| 2009 | Garite <sup>131</sup>   | Impact of a 'rescue course' of antenatal corticosteroids vs placebo on neonatal morbidity                                                     | Perinatal                            | Primary   |
| 2009 | Roos <sup>132</sup>     | perinatal outcome after sustained tocolysis in early labour (APOSTEL-II trial)                                                                | Perinatal                            | Primary   |

## Supplementary Data 2: Table of Included Studies – (with references)

|      |                          |                                                                                              |                             |                       |
|------|--------------------------|----------------------------------------------------------------------------------------------|-----------------------------|-----------------------|
| 2009 | Caritis <sup>133</sup>   | Prevention of preterm birth in triplets using 17 alpha-hydroxyprogesterone caproate          | 1. Perinatal<br>2. Combined | Primary and Secondary |
| 2008 | Rouse <sup>134</sup>     | magnesium sulfate for the prevention of cerebral palsy                                       | Perinatal                   | Primary               |
| 2008 | Mazumder <sup>135</sup>  | Single versus multiple courses of antenatal betamethasone and neonatal outcome               | Perinatal                   | Primary               |
| 2008 | Murphy <sup>136</sup>    | Multiple courses of antenatal corticosteroids vs placebo for preterm birth (MACS)            | Perinatal                   | Primary               |
| 2008 | Rowan <sup>137</sup>     | Metformin versus insulin for the treatment of gestational diabetes                           | Perinatal                   | Primary               |
| 2008 | Nicholson <sup>138</sup> | The impact of the active management of risk in pregnancy at term on birth outcomes           | Perinatal                   | Primary               |
| 2007 | Marret <sup>139</sup>    | Magnesium sulphate given before very-preterm birth to protect infant brain: PREMAG trial     | Combined                    | Primary               |
| 2007 | Smith <sup>140</sup>     | placebo vs transdermal nitroglycerin for preterm labor                                       | Perinatal                   | Primary               |
| 2006 | Wapner <sup>141</sup>    | Single versus weekly courses of antenatal corticosteroids: Evaluation of safety and efficacy | Perinatal                   | Primary               |
| 2006 | Ovalle <sup>142</sup>    | Antibiotic administration to patients with preterm labor and intact                          | Perinatal                   | Primary               |

**Supplementary Data 2: Table of Included Studies – (with references)**

|      |                           |                                                                                                                                   |                    |                       |
|------|---------------------------|-----------------------------------------------------------------------------------------------------------------------------------|--------------------|-----------------------|
|      |                           | membranes in patients with endocervical inflammation                                                                              |                    |                       |
| 2005 | Fraser <sup>143</sup>     | Amnioinfusion for the prevention of the meconium aspiration syndrome                                                              | Combined           | Primary               |
| 2005 | Ramsey <sup>144</sup>     | Subcutaneous tissue reapproximation, alone or in combination with drain, in obese women undergoing cesarean delivery              | Maternal - Wound   | Primary               |
| 2005 | Ganzevoort <sup>145</sup> | two temporising management strategies, one with and one without plasma volume expansion, for severe and early onset pre-eclampsia | Perinatal          | Primary               |
| 2003 | Harrigill <sup>146</sup>  | intraabdominal irrigation vs no irrigation at cesarean delivery on maternal morbidity                                             | Maternal - General | Primary               |
| 2003 | Crowther <sup>147</sup>   | Effect of Magnesium Sulfate Given for Neuroprotection before Preterm Birth                                                        | Perinatal          | Primary and Secondary |
| 2003 | Segel <sup>148</sup>      | Duration of antibiotic therapy (3 vs 7 days) after preterm premature rupture of fetal membranes                                   | Perinatal          | Secondary             |
| 2002 | Landon <sup>149</sup>     | diet therapy and insulin as required versus specific treatment for mild gestational diabetes mellitus                             | Combined           | Primary               |

## Supplementary Data 2: Table of Included Studies – (with references)

|      |                         |                                                                                                                         |                                       |                       |
|------|-------------------------|-------------------------------------------------------------------------------------------------------------------------|---------------------------------------|-----------------------|
| 2001 | Kenyon <sup>150</sup>   | ORACLE - Antibiotics for preterm prelabour rupture of the membranes: Short-term and long-term outcomes                  | Perinatal                             | Primary               |
| 2001 | Guinn <sup>151</sup>    | Single vs weekly courses of antenatal corticosteroids for women at risk of preterm delivery                             | Perinatal                             | Primary               |
| 2001 | Kenyon <sup>152</sup>   | Broad-spectrum antibiotics for spontaneous preterm labour (ORACLE II)                                                   | Perinatal                             | Primary               |
| 2001 | Kenyon <sup>153</sup>   | Broad-spectrum antibiotics for preterm, prelabour rupture of fetal membranes (ORACLE I)                                 | Perinatal                             | Primary               |
| 2000 | Hofmeyer <sup>154</sup> | Planned caesarean section versus planned vaginal birth for breech presentation at term: a randomised multicentre trial. | 1. Maternal - General<br>2. Perinatal | Primary and Secondary |
| 1997 | Rouse <sup>155</sup>    | Chlorhexidine vs sterile water vaginal irrigation for the prevention of periparturient infection                        | Maternal - General                    | Primary               |
| 1997 | Mercer <sup>156</sup>   | Antibiotic therapy for reduction of infant morbidity after preterm premature rupture of the membranes                   | Perinatal                             | Primary               |

## Supplementary Data 2: Table of Included Studies – (with references)

### References

1. Pels A, Jakobsen JC, Ganzevoort W, et al. Detailed statistical analysis plan for the Dutch STRIDER (Sildenafil TheRapy in Dismal prognosis Early-onset fetal growth Restriction) randomised clinical trial on sildenafil versus placebo for pregnant women with severe early onset fetal growth restriction. *Trials* 2019;20:42.
2. Pasquier JC, Claris O, Rabilloud M, et al. Intentional early delivery versus expectant management for preterm premature rupture of membranes at 28-32 weeks' gestation: A multicentre randomized controlled trial (MICADO STUDY). *European Journal of Obstetrics Gynecology and Reproductive Biology* 2019;233:30-7.
3. Baqui AH, Lee ACC, Koffi AK, et al. Prevalence of and risk factors for abnormal vaginal flora and its association with adverse pregnancy outcomes in a rural district in north-east Bangladesh. *Acta Obstetrica et Gynecologica Scandinavica* 2018.
4. Simon VB, Fong A, Nageotte MP. Supplemental Oxygen Study: A Randomized Controlled Study on the Effect of Maternal Oxygen Supplementation during Planned Cesarean Delivery on Umbilical Cord Gases. *American Journal of Perinatology* 2018;35:84-9.
5. Simmons D, Hague WM, Teede HJ, et al. Hyperglycaemia in early pregnancy: the Treatment of Booking Gestational diabetes Mellitus (TOBOGM) study. A randomised controlled trial. *The Medical journal of Australia* 2018;209:405-6.
6. Venkateswaran M, Morkrid K, Ghanem B, et al. eRegQual-an electronic health registry with interactive checklists and clinical decision support for improving quality of antenatal care: Study protocol for a cluster randomized trial. *Trials* 2018;19:54.
7. Goldenberg RL, Nathan RO, Swanson D, et al. Routine antenatal ultrasound in low- and middle-income countries: first look - a cluster randomised trial. *BJOG: An International Journal of Obstetrics and Gynaecology* 2018;125:1591-9.
8. Luitjes SHE, Hermens R, de Wit L, Heymans MW, van Tulder MW, Wouters M. An innovative implementation strategy to improve the use of Dutch guidelines on hypertensive disorders in pregnancy: A randomized controlled trial. *Pregnancy Hypertens* 2018;14:131-8.
9. Nathan HL, Duhig K, Vousden N, et al. Evaluation of a novel device for the management of high blood pressure and shock in pregnancy in low-resource settings: Study protocol for a stepped-wedge cluster-randomised controlled trial (CRADLE-3 trial). *Trials* 2018;19:206.
10. Zaki MN, Wing DA, McNulty JA. Comparison of staples vs subcuticular suture in class III obese women undergoing cesarean: a randomized controlled trial. *Am J Obstet Gynecol* 2018;218:451 e1- e8.
11. Scrafford JD, Reddy B, Rivard C, Vogel RI. Effect of intra-operative glove changing during cesarean section on post-operative complications: a randomized controlled trial. *Arch Gynecol Obstet* 2018;297:1449-54.

## Supplementary Data 2: Table of Included Studies – (with references)

12. Armstrong-Buisseret L, Mitchell E, Hepburn T, et al. Reduced fetal movement intervention Trial-2 (ReMIT-2): Protocol for a pilot randomised controlled trial of standard care informed by the result of a placental growth factor (PIGF) blood test versus standard care alone in women presenting with reduced fetal movement at or after 36+ 0 weeks gestation 11 Medical and Health Sciences 1114 Paediatrics and Reproductive Medicine. *Trials* 2018;19:531.
13. Berry DC, Thomas SD, Dorman KF, et al. Rationale, design, and methods for the Medical Optimization and Management of Pregnancies with Overt Type 2 Diabetes (MOMPOD) study. *BMC Pregnancy and Childbirth* 2018;18:488.
14. Norman JE, Norrie J, Maclennan G, et al. Open randomised trial of the (Arabin) pessary to prevent preterm birth in twin pregnancy with health economics and acceptability: STOPPIT-2-a study protocol. *BMJ Open* 2018;8:e026430.
15. Chappell LC, Chambers J, Dixon PH, et al. Ursodeoxycholic acid versus placebo in the treatment of women with intrahepatic cholestasis of pregnancy (ICP) to improve perinatal outcomes: Protocol for a randomised controlled trial (PITCHES). *Trials* 2018;19:657.
16. Subtil D, Brabant G, Tilloy E, et al. Early clindamycin for bacterial vaginosis in pregnancy (PREMEVA): a multicentre, double-blind, randomised controlled trial. *The Lancet* 2018;392:2171-9.
17. Brocklehurst P, Field D, Greene K, et al. Computerised interpretation of the fetal heart rate during labour: A randomised controlled trial (INFANT). *Health Technology Assessment* 2018;22:1-218.
18. Hermans FJR, Schuit E, Bekker MN, et al. Cervical pessary after arrested preterm labor: A randomized controlled trial. *Obstetrics and Gynecology* 2018;132:741-9.
19. Cahill AG, Srinivas SK, Tita ATN, et al. Effect of Immediate vs Delayed Pushing on Rates of Spontaneous Vaginal Delivery among Nulliparous Women Receiving Neuraxial Analgesia: A Randomized Clinical Trial. *JAMA - Journal of the American Medical Association* 2018;320:1444-54.
20. Dugoff L, Berghella V, Sehdev H, Mackeen AD, Goetzl L, Ludmir J. Prevention of preterm birth with pessary in singletons (PoPPS): randomized controlled trial. *Ultrasound in obstetrics & gynecology : the official journal of the International Society of Ultrasound in Obstetrics and Gynecology* 2018;51:573-9.
21. Blackwell SC, Gyamfi-Bannerman C, Biggio JR, et al. PROLONG Clinical Study Protocol: Hydroxyprogesterone Caproate to Reduce Recurrent Preterm Birth. *American Journal of Perinatology* 2018;35:1228-34.
22. Grobman W. A randomized trial of elective induction of labor at 39 weeks compared with expectant management of low-risk nulliparous women. *American Journal of Obstetrics and Gynecology* 2018;218:S601.
23. Senat MV, Affres H, Letourneau A, et al. Effect of Glyburide vs subcutaneous insulin on perinatal complications among women with gestational diabetes a randomized clinical trial. *JAMA - Journal of the American Medical Association* 2018;319:1773-80.
24. Balogun OA, Sibai BM, Pedroza C, Blackwell SC, Barrett TL, Chauhan SP. Serial Third-Trimester Ultrasonography Compared With Routine Care in Uncomplicated Pregnancies: A Randomized Controlled Trial. *Obstetrics and gynecology* 2018;132:1358-67.



## Supplementary Data 2: Table of Included Studies – (with references)

25. Norman JE, Marlow N, Messow CM, et al. Does progesterone prophylaxis to prevent preterm labour improve outcome? A randomised double-blind placebo-controlled trial (OPPTIMUM). *Health Technology Assessment* 2018;22:1-304.
26. Price S, Nankervis A, Permezel M, Prendergast L, Sumithran P, Proietto J. Health consequences for mother and baby of substantial pre-conception weight loss in obese women: Study protocol for a randomized controlled trial. *Trials* 2018;19:248.
27. Wihbey KA, Joyce EM, Spalding ZT, et al. Prophylactic Negative Pressure Wound Therapy and Wound Complication after Cesarean Delivery in Women with Class II or III Obesity: A Randomized Controlled Trial. *Obstetrics and Gynecology* 2018;132:377-84.
28. Bardou M, Crepon B, Bertaux AC, et al. NAITRE study on the impact of conditional cash transfer on poor pregnancy outcomes in underprivileged women: Protocol for a nationwide pragmatic cluster-randomised superiority clinical trial in France. *BMJ Open* 2017;7:017321.
29. Schreiber K, Breen K, Cohen H, et al. HYdroxychloroquine to Improve Pregnancy Outcome in Women with ANTIphospholipid Antibodies (HYPATIA) Protocol: A Multinational Randomized Controlled Trial of Hydroxychloroquine versus Placebo in Addition to Standard Treatment in Pregnant Women with Antiphospholipid Syndrome or Antibodies. *Seminars in Thrombosis and Hemostasis* 2017;43:562-71.
30. Fransen AF, van de Ven J, Schuit E, van Tetering A, Mol BW, Oei SG. Simulation-based team training for multi-professional obstetric care teams to improve patient outcome: a multicentre, cluster randomised controlled trial. *BJOG* 2017;124:641-50.
31. Linden JA, Grimmnitz B, Hagopian L, et al. Is the Pelvic Examination Still Crucial in Patients Presenting to the Emergency Department With Vaginal Bleeding or Abdominal Pain When an Intrauterine Pregnancy Is Identified on Ultrasonography? A Randomized Controlled Trial. *Ann Emerg Med* 2017;70:825-34.
32. Ruhstaller K, Downes KL, Chandrasekaran S, Srinivas S, Durnwald C. Prophylactic Wound Vacuum Therapy after Cesarean Section to Prevent Wound Complications in the Obese Population: A Randomized Controlled Trial (the ProVac Study). *Am J Perinatol* 2017;34:1125-30.
33. Pasquier JC, Fraser W, Blouin S, et al. A cluster-randomized trial to reduce major perinatal morbidity among women with one prior cesarean delivery in Quebec (PRISMA trial): Study protocol for a randomized controlled trial. *Trials* 2017;18:434.
34. Zijl MDv, Koullali B, Naaktgeboren CA, et al. Pessary or Progesterone to Prevent Preterm delivery in women with short cervical length: The Quadruple P randomised controlled trial. *BMC Pregnancy and Childbirth* 2017;17:284.
35. Berghella V, Dugoff L, Ludmir J. Prevention of preterm birth with pessary in twins (PoPPT): a randomized controlled trial. *Ultrasound in obstetrics & gynecology : the official journal of the International Society of Ultrasound in Obstetrics and Gynecology* 2017;49:567-72.

## Supplementary Data 2: Table of Included Studies – (with references)

36. Dodd J, Andersen C, Dickinson J, Kilby M, Windrim R, Ryan G. Fetal middle cerebral artery Doppler to time second and subsequent intrauterine transfusions to treat anaemia due to red cell allo-immunisation: A randomised trial. *BJOG: An International Journal of Obstetrics and Gynaecology* 2017;124:11-2.
37. Semrau KEA, Hirschhorn LR, Delaney MM, et al. Outcomes of a coaching-based WHO safe childbirth checklist program in India. *New England Journal of Medicine* 2017;377:2313-24.
38. Groom KM, McCowan LM, Mackay LK, et al. Enoxaparin for the prevention of preeclampsia and intrauterine growth restriction in women with a history: a randomized trial. *American Journal of Obstetrics and Gynecology* 2017;216:296.
39. Springel EH, Wang XY, Sarfoh V, Stetzer B, Weight S, Mercer B. A randomized controlled trial of chlorhexidine-alcohol versus povidone-iodine for cesarean antisepsis. *American Journal of Obstetrics and Gynecology* 2017;216:S30.
40. Koullali B, Kempen LEMv, Zijl MDv, et al. A multi-centre, non-inferiority, randomised controlled trial to compare a cervical pessary with a cervical cerclage in the prevention of preterm delivery in women with short cervical length and a history of preterm birth - PC study. *BMC Pregnancy and Childbirth* 2017;17:215.
41. Rodo C, Arevalo S, Lewi L, et al. Arabin cervical pessary for prevention of preterm birth in cases of twin-to-twin transfusion syndrome treated by fetoscopic LASER coagulation: The PECEP LASER randomised controlled trial. *BMC Pregnancy and Childbirth* 2017;17:256.
42. Visser L, Boer MAd, Groot CJMd, et al. Low dose aspirin in the prevention of recurrent spontaneous preterm labour - the APRIL study: A multicenter randomized placebo controlled trial. *BMC Pregnancy and Childbirth* 2017;17:223.
43. Crowther CA, Ashwood P, McPhee AJ, et al. Vaginal progesterone pessaries for pregnant women with a previous preterm birth to prevent neonatal respiratory distress syndrome (the PROGRESS Study): A multicentre, randomised, placebo-controlled trial. *PLoS Medicine* 2017;14:e1002390.
44. Connolly KA, Kohari KS, Factor SH, et al. A Randomized Trial of Foley Balloon Induction of Labor Trial in Multiparas (FIAT-M). *American Journal of Perinatology* 2017;34:1108-14.
45. Wattar BHA, Dodds J, Placzek A, et al. Effect of simple, targeted diet in pregnant women with metabolic risk factors on maternal and fetal outcomes (ESTEEM): Study protocol for a pragmatic multicentre randomised trial. *BMJ Open* 2016;6:e013495.
46. Barasinski C, Vendittelli F. Effect of the type of maternal pushing during the second stage of labour on obstetric and neonatal outcome: A multicentre randomised trial - The EOLE study protocol. *BMJ Open* 2016;6:e012290.
47. Salim R, Nachum Z, Gavish I, Romano S, Braverman M, Garmi G. Adjusting enoxaparin dosage according to anti-fxa levels and pregnancy outcome in thrombophilic women: A randomised controlled trial. *Thrombosis and Haemostasis* 2016;116:687-95.
48. Feig DS, Murphy K, Asztalos E, et al. Metformin in women with type 2 diabetes in pregnancy (MiTy): A multi-center randomized controlled trial. *BMC Pregnancy and Childbirth* 2016;16:173.

## Supplementary Data 2: Table of Included Studies – (with references)

49. Kimani J, Phiri K, Kamiza S, et al. Efficacy and safety of azithromycin-chloroquine versus sulfadoxine-pyrimethamine for intermittent preventive treatment of plasmodium falciparum malaria infection in pregnant women in Africa: An open-label, randomized trial. *PLoS ONE* 2016;11:e0157045.
50. Haddad B, Winer N, Chitrit Y, et al. Enoxaparin and Aspirin Compared with Aspirin Alone to Prevent Placenta-Mediated Pregnancy Complications. *Obstetrics and Gynecology* 2016;128:1053-63.
51. Madanitsa M, Kalilani L, Mwapasa V, et al. Scheduled Intermittent Screening with Rapid Diagnostic Tests and Treatment with Dihydroartemisinin-Piperaquine versus Intermittent Preventive Therapy with Sulfadoxine-Pyrimethamine for Malaria in Pregnancy in Malawi: An Open-Label Randomized Controlled Trial. *PLoS Medicine* 2016;13:e1002124.
52. McCarthy EA, Walker SP, Ugoni A, Lappas M, Leong O, Shub A. Self-weighing and simple dietary advice for overweight and obese pregnant women to reduce obstetric complications without impact on quality of life: A randomised controlled trial. *BJOG: An International Journal of Obstetrics and Gynaecology* 2016;123:965-73.
53. Ducloy-Bouthors AS, Mignon A, Huissoud C, Grouin JM, Mercier FJ. Fibrinogen concentrate as a treatment for postpartum haemorrhage-induced coagulopathy: A study protocol for a randomised multicentre controlled trial. The fibrinogen in haemorrhage of DELivery (FIDEL) trial. *Anaesthesia Critical Care and Pain Medicine* 2016;35:293-8.
54. Duggal N, Poddatorri V, Noroozkhani S, Siddik-Ahmad RI, Caughey AB. Perioperative oxygen supplementation and surgical site infection after cesarean delivery: A randomized trial. *Obstetrics and Gynecology* 2013;122:79-84.
55. Vliet EOGV, Nijman TAJ, Schuit E, et al. Nifedipine versus atosiban for threatened preterm birth (APOSTEL III): A multicentre, randomised controlled trial. *The Lancet* 2016;387:2117-24.
56. Norman JE, Marlow N, Messow CM, et al. Vaginal progesterone prophylaxis for preterm birth (the OPPTIMUM study): A multicentre, randomised, double-blind trial. *The Lancet* 2016;387:2106-16.
57. Eikelder MLGT, Rengerink KO, Jozwiak M, et al. Induction of labour at term with oral misoprostol versus a Foley catheter (PROBAAT-II): A multicentre randomised controlled non-inferiority trial. *The Lancet* 2016;387:1619-28.
58. Murphy VE, Jensen ME, Mattes J, et al. The Breathing for Life Trial: A randomised controlled trial of fractional exhaled nitric oxide (FENO)-based management of asthma during pregnancy and its impact on perinatal outcomes and infant and childhood respiratory health. *BMC Pregnancy and Childbirth* 2016;16:111.
59. Angelo AD, Valsecchi L. High dose antithrombin supplementation in early preeclampsia: A randomized, double blind, placebo-controlled study. *Thrombosis Research* 2016;140:7-13.
60. Nijman TAJ, Vliet EOGv, Naaktgeboren CA, et al. Nifedipine versus placebo in the treatment of preterm prelabor rupture of membranes: a randomized controlled trial: Assessment of perinatal outcome by use of tocolysis in early labor-APOSTEL IV trial. *European Journal of Obstetrics Gynecology and Reproductive Biology* 2016;205:79-84.
61. Gyamfi-Bannerman C, Thom EA, Blackwell SC, et al. Antenatal Betamethasone for Women at Risk for Late Preterm Delivery. *N Engl J Med* 2016;374:1311-20.

## Supplementary Data 2: Table of Included Studies – (with references)

62. Elden H, Hagberg H, Wessberg A, et al. Study protocol of SWEPIs a Swedish multicentre register based randomised controlled trial to compare induction of labour at 41 completed gestational weeks versus expectant management and induction at 42 completed gestational weeks. *BMC Pregnancy and Childbirth* 2016;16:49.
63. Fang JH, Zhang SH, Yu XM, Yang Y. Effects of quercetin and melatonin in pregnant and gestational diabetic women. *Latin American Journal of Pharmacy* 2016;35:1420-5.
64. Garcia B, Llurba E, Valle L, et al. Do knowledge of uterine artery resistance in the second trimester and targeted surveillance improve maternal and perinatal outcome? UTOPIA study: a randomized controlled trial. *Ultrasound in obstetrics & gynecology : the official journal of the International Society of Ultrasound in Obstetrics and Gynecology* 2016;47:680-9.
65. Henrichs J, Verfaillie V, Viester L, et al. Effectiveness and cost-effectiveness of routine third trimester ultrasound screening for intrauterine growth restriction: Study protocol of a nationwide stepped wedge cluster-randomized trial in The Netherlands (The IRIS Study). *BMC Pregnancy and Childbirth* 2016;16:310.
66. Tita ATN, Szychowski JM, Boggess K, et al. Adjunctive azithromycin prophylaxis for cesarean delivery. *New England Journal of Medicine* 2016;375:1231-41.
67. Widmer M, Piaggio G, Abdel-Aleem H, et al. Room temperature stable carbetocin for the prevention of postpartum haemorrhage during the third stage of labour in women delivering vaginally: Study protocol for a randomized controlled trial. *Trials* 2016;17:143.
68. Kakuru A, Jagannathan P, Muhindo MK, et al. Dihydroartemisinin-piperaquine for the prevention of malaria in pregnancy. *New England Journal of Medicine* 2016;374:928-39.
69. Nicolaides KH, Syngelaki A, Poon LC, et al. Cervical pessary placement for prevention of preterm birth in unselected twin pregnancies: A randomized controlled trial. *American Journal of Obstetrics and Gynecology* 2016;214:3.
70. Hezelgrave NL, Watson HA, Ridout A, et al. Rationale and design of SuPPoRT: A multi-centre randomised controlled trial to compare three treatments: Cervical cerclage, cervical pessary and vaginal progesterone, for the prevention of preterm birth in women who develop a short cervix. *BMC Pregnancy and Childbirth* 2016;16:358.
71. Hermans FJR, Schuit E, Opmeer BC, et al. Effectiveness of a cervical pessary for women who did not deliver 48 h after threatened preterm labor (Assessment of perinatal outcome after specific treatment in early labor: Apostel VI trial). *BMC Pregnancy and Childbirth* 2016;16:154.
72. Goya M, Calle MDL, Pratcorona L, et al. Cervical pessary to prevent preterm birth in women with twin gestation and sonographic short cervix: A multicenter randomized controlled trial (PECEP-Twins). *American Journal of Obstetrics and Gynecology* 2016;214:145-52.
73. Morris JM, Roberts CL, Bowen JR, et al. Immediate delivery compared with expectant management after preterm pre-labour rupture of the membranes close to term (PPROMT trial): A randomised controlled trial. *The Lancet* 2016;387:444-52.

## Supplementary Data 2: Table of Included Studies – (with references)

74. Connolly KA, Kohari KS, Rekawek P, et al. A randomized trial of Foley balloon induction of labor trial in nulliparas (FIAT-N). *American Journal of Obstetrics and Gynecology* 2016;215:392.
75. Equy V, David-Tchouda S, Dreyfus M, et al. Clinical impact of the disposable ventouse iCup versus a metallic vacuum cup: A multicenter randomized controlled trial. *BMC Pregnancy and Childbirth* 2015;15:332.
76. Broekhuijsen K, Baaren GJV, Pampus MG, et al. Immediate delivery versus expectant monitoring for hypertensive disorders of pregnancy between 34 and 37 weeks of gestation (HYPITAT-II): An open-label, randomised controlled trial. *The Lancet* 2015;385:2492-501.
77. Boulvain M, Senat MV, Perrotin F, et al. Induction of labour versus expectant management for large-for-date fetuses: A randomised controlled trial. *The Lancet* 2015;385:2600-5.
78. Os MAV, Ven AJVD, Kleinrouweler CE, et al. Preventing Preterm Birth with Progesterone in Women with a Short Cervical Length from a Low-Risk Population: A Multicenter Double-Blind Placebo-Controlled Randomized Trial. *American Journal of Perinatology* 2015;32:993-1000.
79. Hammad IA, Chauhan SP, Mlynarczyk M, et al. Uncomplicated Pregnancies and Ultrasounds for Fetal Growth Restriction: A Pilot Randomized Clinical Trial. *AJP Reports* 2015;6:e83-e90.
80. George A, Mathews JE, Sam D, et al. Comparison of neonatal outcomes in women with gestational diabetes with moderate hyperglycaemia on metformin or glibenclamide - A randomised controlled trial. *Australian and New Zealand Journal of Obstetrics and Gynaecology* 2015;55:47-52.
81. Awwad J, Usta IM, Ghazeeri G, et al. A randomised controlled double-blind clinical trial of 17-hydroxyprogesterone caproate for the prevention of preterm birth in twin gestation (PROGESTWIN): Evidence for reduced neonatal morbidity. *BJOG: An International Journal of Obstetrics and Gynaecology* 2015;122:71-9.
82. Belfort MA, Saade GR, Thom E, et al. A randomized trial of intrapartum fetal ECG ST-segment analysis. *New England Journal of Medicine* 2015;373:632-41.
83. Desai M, Gutman J, Lanziva AL, et al. Intermittent screening and treatment or intermittent preventive treatment with dihydroartemisinin-piperazine versus intermittent preventive treatment with sulfadoxine-pyrimethamine for the control of malaria during pregnancy in western Kenya: An open-label, three-group, randomised controlled superiority trial. *The Lancet* 2015;386:2507-19.
84. Cluver CA, Walker SP, Mol BW, et al. Double blind, randomised, placebocontrolled trial to evaluate the efficacy of esomeprazole to treat early onset pre-eclampsia (PIE Trial): A study protocol. *BMJ Open* 2015;5:e008211.
85. Combs CA, Garite TJ, Maurel K, et al. 17-hydroxyprogesterone caproate for preterm rupture of the membranes: A multicenter, randomized, double-blind, placebo-controlled trial. *American Journal of Obstetrics and Gynecology* 2015;213:364e1-e12.

## Supplementary Data 2: Table of Included Studies – (with references)

86. Brizot ML, Hernandez W, Liao AW, et al. Vaginal progesterone for the prevention of preterm birth in twin gestations: a randomized placebo-controlled double-blind study. *American Journal of Obstetrics and Gynecology* 2015;213:82.
87. Alves JGB, Araujo CAFLd, Pontes IEA, Guimaraes AC, Ray JG. The BRAZil MAGnesium (BRAMAG) trial: A randomized clinical trial of oral magnesium supplementation in pregnancy for the prevention of preterm birth and perinatal and maternal morbidity. *BMC Pregnancy and Childbirth* 2014;14:222.
88. Rodger MA, Hague WM, Kingdom J, et al. Antepartum dalteparin versus no antepartum dalteparin for the prevention of pregnancy complications in pregnant women with thrombophilia (TIPPS): A multinational open-label randomised trial. *The Lancet* 2014;384:1673-83.
89. McClure EM, Nathan RO, Saleem S, et al. First look: A cluster-randomized trial of ultrasound to improve pregnancy outcomes in low income country settings. *BMC Pregnancy and Childbirth* 2014;14:73.
90. MacKeen AD, Khalifeh A, Fleisher J, et al. Suture compared with staple skin closure after cesarean delivery: A randomized controlled trial. *Obstetrics and Gynecology* 2014;123:1169-75.
91. Esmer AC, Goksedef PC, Akca A, et al. Role of subcutaneous closure in preventing wound complications after cesarean delivery with Pfannenstiel incision: A randomized clinical trial. *Journal of Obstetrics and Gynaecology Research* 2014;40:728-35.
92. Liem S, Schuit E, Hegeman M, et al. Cervical pessaries for prevention of preterm birth in women with a multiple pregnancy (ProTWIN): A multicentre, open-label randomised controlled trial. *Obstetrical and Gynecological Survey* 2014;69:73-5.
93. Barrett JFR, Hannah ME, Hutton EK, et al. Randomized trial of planned cesarean or vaginal delivery for twin pregnancy. *Obstetrical and Gynecological Survey* 2014;69:61-2.
94. Schmitz T, Fuchs F, Closset E, et al. Outpatient cervical ripening by nitric oxide donors for prolonged pregnancy. *Obstetrics and Gynecology* 2014;124:1089-97.
95. Slaghekke F, Lopriore E, Lewi L, et al. Fetoscopic laser coagulation of the vascular equator versus selective coagulation for twin-to-twin transfusion syndrome: An open-label randomised controlled trial. *The Lancet* 2014;383:2144-51.
96. Kamat S, Veena P, Rani R. Comparison of nifedipine and progesterone for maintenance tocolysis after arrested preterm labour. *Journal of Obstetrics and Gynaecology* 2014;34:322-5.
97. Galyean A, Garite TJ, Maurel K, et al. Removal versus retention of cerclage in preterm premature rupture of membranes: a randomized controlled trial. *American journal of obstetrics and gynecology* 2014;211:399-7.
98. Ayala DE, Ucieda R, Hermida RC. Chronotherapy with low-dose aspirin for prevention of complications in pregnancy. *Chronobiology International* 2013;30:260-79.

## Supplementary Data 2: Table of Included Studies – (with references)

99. Glavind J, Kindberg SF, Uldbjerg N, et al. Elective caesarean section at 38 weeks versus 39 weeks: Neonatal and maternal outcomes in a randomised controlled trial. *BJOG: An International Journal of Obstetrics and Gynaecology* 2013;120:1123-32.
100. Group CC, Abalos E, Addo V, et al. Caesarean section surgical techniques (CORONIS): a fractional, factorial, unmasked, randomised controlled trial. *Lancet* 2013;382:234-48.
101. Figueroa D, Jauk VC, Szychowski JM, et al. Surgical staples compared with subcuticular suture for skin closure after cesarean delivery: A randomized controlled trial. *Obstetrics and Gynecology* 2013;121:33-8.
102. Francis C, Mumford M, Strand ML, Moore ES, Strand EA. Timing of prophylactic antibiotic at cesarean section: A double-blinded, randomized trial. *Journal of Perinatology* 2013;33:759-62.
103. Roos C, Spaanderman MEA, Schuit E, et al. Effect of maintenance tocolysis with nifedipine in threatened preterm labor on perinatal outcomes: A randomized controlled trial. *JAMA - Journal of the American Medical Association* 2013;309:41-7.
104. Heazell AEP, Bernatavicius G, Roberts SA, et al. A randomised controlled trial comparing standard or intensive management of reduced fetal movements after 36 weeks gestation-a feasibility study. *BMC Pregnancy and Childbirth* 2013;13:95.
105. Kwak HM, Shin MY, Cha HH, et al. The efficacy of cefazolin plus macrolide (erythromycin or clarithromycin) versus cefazolin alone in neonatal morbidity and placental inflammation for women with preterm premature rupture of membranes. *Placenta* 2013;34:346-52.
106. Nuthalapaty FS, Lee CM, Lee JH, Kuper SG, H. L. Higdon r. A randomized controlled trial of early versus delayed skin staple removal following caesarean section in the obese patient. *Journal of obstetrics and gynaecology Canada : JOGC = Journal d'obstetrique et gynecologie du Canada : JOGC* 2013;35:426-33.
107. Crowther CA, Middleton PF, Wilkinson D, Ashwood P, Haslam R. Magnesium sulphate at 30 to 34 weeks' gestational age: Neuroprotection trial (MAGENTA) - study protocol. *BMC Pregnancy and Childbirth* 2013;13:91.
108. Gracia PV-D, Tejada OR, Minaca AC, et al. Expectant management of severe preeclampsia remote from term: The MEXPRE Latin Study, a randomized, multicenter clinical trial. *American Journal of Obstetrics and Gynecology* 2013;209:425.
109. Seal SL, Ghosh D, Kamilya G, Mukherji J, Hazra A, Garain P. Does route of delivery affect maternal and perinatal outcome in women with eclampsia? A randomized controlled pilot study. *American Journal of Obstetrics and Gynecology* 2012;206:484.
110. Martinelli I, Ruggenti P, Cetin I, et al. Heparin in pregnant women with previous placenta-mediated pregnancy complications: A prospective, randomized, multicenter, controlled clinical trial. *Blood* 2012;119:3269-75.
111. Dioulasso B, Faso B, Meda N, et al. Maternal HIV-1 disease progression 18-24 months postdelivery according to antiretroviral prophylaxis regimen (triple-antiretroviral prophylaxis during pregnancy and breastfeeding vs

## Supplementary Data 2: Table of Included Studies – (with references)

zidovudine/single-dose nevirapine prophylaxis): The kesho bora randomized controlled trial. *Clinical Infectious Diseases* 2012;55:449-60.

112. Grobman WA, Thom EA, Spong CY, et al. 17 alpha-hydroxyprogesterone caproate to prevent prematurity in nulliparas with cervical length less than 30 mm. *American Journal of Obstetrics and Gynecology* 2012;207:390.

113. Dodd JM, Crowther CA, Haslam RR, Robinson JS. Elective birth at 37 weeks of gestation versus standard care for women with an uncomplicated twin pregnancy at term: The Twins Timing of Birth Randomised Trial. *BJOG: An International Journal of Obstetrics and Gynaecology* 2012;119:964-73.

114. Norman JE, Shennan A, Bennett P, et al. Trial protocol OPPTIMUM- Does progesterone prophylaxis for the prevention of preterm labour improve outcome? *BMC Pregnancy and Childbirth* 2012;12:79.

115. Gris JC, Chauleur C, Molinari N, et al. Addition of enoxaparin to aspirin for the secondary prevention of placental vascular complications in women with severe pre-eclampsia: The pilot randomised controlled NOH-PE trial. *Thrombosis and Haemostasis* 2011;106:1053-61.

116. Gris JCR, Chauleur C, Mares P, et al. Enoxaparin for the secondary prevention of placental vascular complications in women with previous severe pre-eclampsia: The pilot randomised controlled NOH-PE study. *Journal of Thrombosis and Haemostasis* 2011;9:753.

117. Scifres CM, Leighton BL, Fogertey PJ, MacOnes GA, Stamilio DM. Supplemental oxygen for the prevention of postcesarean infectious morbidity: A randomized controlled trial. *American Journal of Obstetrics and Gynecology* 2011;205:267.

118. Boers KE, Vijgen SMC, Bijlenga D, et al. Induction versus expectant monitoring for intrauterine growth restriction at term: Randomised equivalence trial (DIGITAT). *BMJ* 2011;342:35.

119. Combs CA, Garite T, Maurel K, Das A, Porto M. 17-hydroxyprogesterone caproate for twin pregnancy: A double-blind, randomized clinical trial. *American Journal of Obstetrics and Gynecology* 2011;204:221.

120. Lim AC, Schuit E, Bloemenkamp K, et al. 17alpha-hydroxyprogesterone caproate for the prevention of adverse neonatal outcome in multiple pregnancies: A randomized controlled trial. *Obstetrics and Gynecology* 2011;118:513-20.

121. Combs CA, Thomas JG, Kimberly M, et al. 17-Hydroxyprogesterone caproate to prolong pregnancy after preterm rupture of the membranes: early termination of a double-blind, randomized clinical trial. *BMC research notes* 2011;4:568.

122. Haas DM, Pazouki F, Smith RR, et al. Vaginal cleansing before cesarean delivery to reduce postoperative infectious morbidity: a randomized, controlled trial. *American Journal of Obstetrics and Gynecology* 2010;202:310.

123. Vanky E, Stridsklev S, Heimstad R, et al. Metformin Versus placebo from first trimester to delivery in polycystic ovary syndrome: A randomized, controlled multicenter study. *Journal of Clinical Endocrinology and Metabolism* 2010;95:E448-E55.



## Supplementary Data 2: Table of Included Studies – (with references)

124. Basha SL, Rochon ML, Quiones JN, Coassolo KM, Rust OA, Smulian JC. Randomized controlled trial of wound complication rates of subcuticular suture vs staples for skin closure at cesarean delivery. *American Journal of Obstetrics and Gynecology* 2010;203:285.
125. Combs CA, Garite T, Maurel K, Das A, Porto M. Failure of 17-hydroxyprogesterone to reduce neonatal morbidity or prolong triplet pregnancy: A double-blind, randomized clinical trial. *American Journal of Obstetrics and Gynecology* 2010;203:248.
126. Macones GA, Parry S, Nelson DB, et al. Treatment of localized periodontal disease in pregnancy does not reduce the occurrence of preterm birth: results from the Periodontal Infections and Prematurity Study (PIPS). *American Journal of Obstetrics and Gynecology* 2010;202:147.
127. Nassar A, Abu-Musa AA, Awwad J, Khalil A, Tabbara J, Usta IM. Two dose regimens of nifedipine for management of preterm labor: A randomized controlled trial. *American Journal of Perinatology* 2009;26:575-81.
128. Landon MB, Spong CY, Thom E, et al. A multicenter, randomized trial of treatment for mild gestational diabetes. *New England Journal of Medicine* 2009;361:1339-48.
129. Rey E, Garneau P, David M, et al. Dalteparin for the prevention of recurrence of placental-mediated complications of pregnancy in women without thrombophilia: A pilot randomized controlled trial. *Journal of Thrombosis and Haemostasis* 2009;7:58-64.
130. Koopmans CM, Bijlenga D, Groen H, et al. Induction of labour versus expectant monitoring for gestational hypertension or mild pre-eclampsia after 36 weeks' gestation (HYPITAT): a multicentre, open-label randomised controlled trial. *The Lancet* 2009;374:979-88.
131. Garite TJ, Kurtzman J, Maurel K, Clark R. Impact of a 'rescue course' of antenatal corticosteroids: a multicenter randomized placebo-controlled trial. *American Journal of Obstetrics and Gynecology* 2009;200:248.
132. Roos C, Scheepers LHCJ, Bloemenkamp KWM, et al. Assessment of perinatal outcome after sustained tocolysis in early labour (APOSTEL-II trial). *BMC Pregnancy and Childbirth* 2009;9:42.
133. Caritis SN, Rouse DJ, Peaceman AM, et al. Prevention of preterm birth in triplets using 17 alpha-hydroxyprogesterone caproate: A randomized controlled trial. *Obstetrics and Gynecology* 2009;113:285-92.
134. Rouse DJ, Hirtz DG, Thom E, et al. A randomized, controlled trial of magnesium sulfate for the prevention of cerebral palsy. *New England Journal of Medicine* 2008;359:895-905.
135. Mazumder P, Dutta S, Kaur J, Narang A. Single versus multiple courses of antenatal betamethasone and neonatal outcome: A randomized controlled trial. *Indian Pediatrics* 2008;45:661-7.
136. Murphy KE, Hannah ME, Willan AR, et al. Multiple courses of antenatal corticosteroids for preterm birth (MACS): a randomised controlled trial. *The Lancet* 2008;372:2143-51.
137. Rowan JA, Hague WM, Gao W, Battin MR, Moore MP. Metformin versus insulin for the treatment of gestational diabetes. *New England Journal of Medicine* 2008;358:2003-15.

## Supplementary Data 2: Table of Included Studies – (with references)

138. Nicholson JM, Parry S, Caughey AB, Rosen S, Keen A, Macones GA. The impact of the active management of risk in pregnancy at term on birth outcomes: a randomized clinical trial. *American Journal of Obstetrics and Gynecology* 2008;198:511.
139. Marret S, Marpeau L, Zupan-Simunek V, et al. Magnesium sulphate given before very-preterm birth to protect infant brain: The randomised controlled PREMAG trial. *BJOG: An International Journal of Obstetrics and Gynaecology* 2007;114:310-8.
140. Smith GN, Walker MC, Ohlsson A, Brien KO, Windrim R. Randomized double-blind placebo-controlled trial of transdermal nitroglycerin for preterm labor. *American Journal of Obstetrics and Gynecology* 2007;196:37.
141. Wapner RJ, Sorokin Y, Thom EA, et al. Single versus weekly courses of antenatal corticosteroids: Evaluation of safety and efficacy. *American Journal of Obstetrics and Gynecology* 2006;195:633-42.
142. Ovalle A, Romero R, Gomez R, et al. Antibiotic administration to patients with preterm labor and intact membranes: Is there a beneficial effect in patients with endocervical inflammation? *Journal of Maternal-Fetal and Neonatal Medicine* 2006;19:453-64.
143. Fraser WD, Hofmeyr J, Lede R, et al. Amnioinfusion for the prevention of the meconium aspiration syndrome. *New England Journal of Medicine* 2005;353:909-17.
144. Ramsey PS, White AM, Guinn DA, et al. Subcutaneous tissue reapproximation, alone or in combination with drain, in obese women undergoing cesarean delivery. *Obstetrics and Gynecology* 2005;105:967-73.
145. Ganzevoort W, Rep A, Bonsel GJ, et al. A randomised controlled trial comparing two temporising management strategies, one with and one without plasma volume expansion, for severe and early onset pre-eclampsia. *BJOG: An International Journal of Obstetrics and Gynaecology* 2005;112:1358-68.
146. Harrigill KM, Miller HS, Haynes DE. The effect of intraabdominal irrigation at cesarean delivery on maternal morbidity: A randomized trial. *Obstetrics and Gynecology* 2003;101:80-5.
147. Crowther CA, Hiller JE, Doyle LW, Haslam RR. Effect of Magnesium Sulfate Given for Neuroprotection before Preterm Birth: A Randomized Controlled Trial. *Journal of the American Medical Association* 2003;290:2669-76.
148. Segel SY, Miles AM, Clothier B, Parry S, Macones GA. Duration of antibiotic therapy after preterm premature rupture of fetal membranes. *American Journal of Obstetrics and Gynecology* 2003;189:799-802.
149. Landon MB, Thom E, Spong CY, et al. A planned randomized clinical trial of treatment for mild gestational diabetes mellitus. *Journal of Maternal-Fetal and Neonatal Medicine* 2002;11:226-31.
150. Kenyon S, Taylor DJ, Tarnow-Mordi WO. ORACLE - Antibiotics for preterm prelabour rupture of the membranes: Short-term and long-term outcomes. *Acta Paediatrica, International Journal of Paediatrics, Supplement* 2001;91:12-5.
151. Guinn DA, Atkinson MW, Sullivan L, et al. Single vs weekly courses of antenatal corticosteroids for women at risk of preterm delivery: A randomized controlled trial. *Journal of the American Medical Association* 2001;286:1581-7.

## Supplementary Data 2: Table of Included Studies – (with references)

152. Kenyon SL, Taylor DJ, Tarnow-Mordi W, Oracle Collaborative G. Broad-spectrum antibiotics for spontaneous preterm labour: the ORACLE II randomised trial. ORACLE Collaborative Group. *Lancet* (London, England) 2001;357:989-94.
153. Kenyon SL, Taylor DJ, Tarnow-Mordi W, Oracle Collaborative G. Broad-spectrum antibiotics for preterm, prelabour rupture of fetal membranes: the ORACLE I randomised trial. ORACLE Collaborative Group. *Lancet* (London, England) 2001;357:979-88.
154. Hofmeyr GJ, Hannah M, Lawrie TA. Planned caesarean section for term breech delivery. *The Cochrane database of systematic reviews* 2015;7:CD000166.
155. Rouse DJ, Hauth JC, Andrews WW, Mills BB, Maher JE. Chlorhexidine vaginal irrigation for the prevention of periparturient infection: A placebo-controlled randomized clinical trial. *American Journal of Obstetrics and Gynecology* 1997;176:617-22.
156. Mercer BM, Miodovnik M, Thurnau GR, et al. Antibiotic therapy for reduction of infant morbidity after preterm premature rupture of the membranes: A randomized controlled trial. *Journal of the American Medical Association* 1997;278:989-95.
