# Supplementary material for: Composite adverse outcomes in obstetric studies: a systematic review
Source: PubMed Central journal article supplement (PMC7863533; doi:10.1186/s12884-021-03588-w), 2021-02-05

**Supplementary Data 3: Components outcomes included in maternal wound-related composite outcomes**

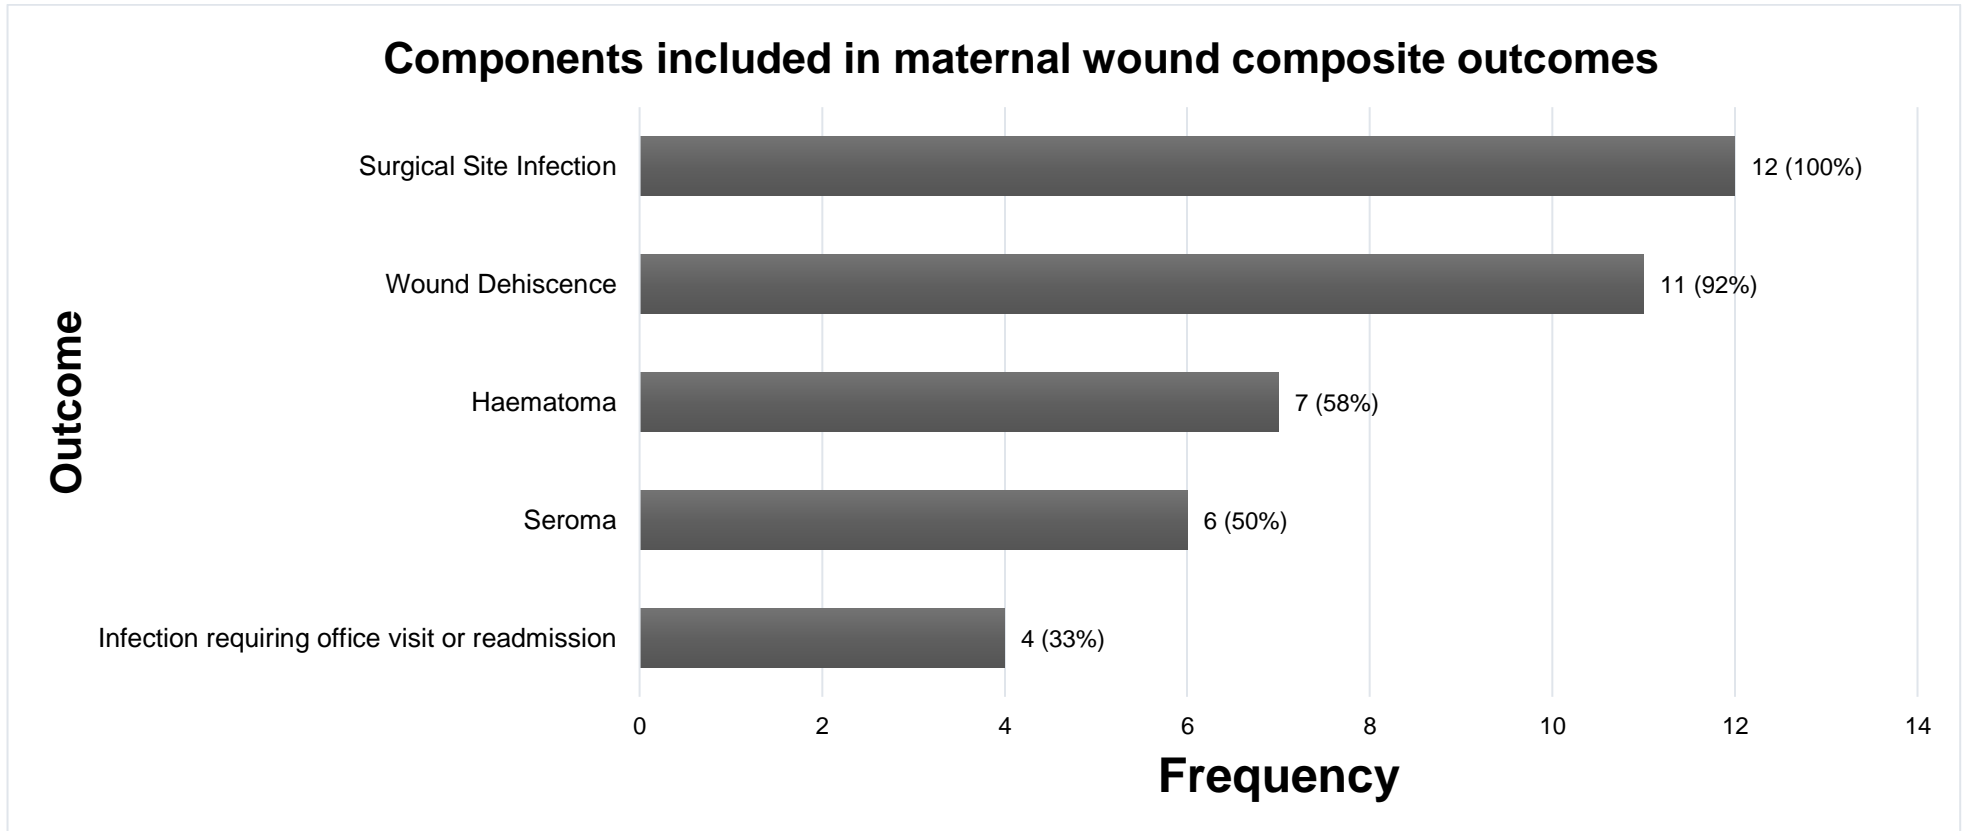

Supplement: 12884_2021_3588_MOESM3_ESM.pdf [file 12884_2021_3588_MOESM3_ESM.pdf]
