# Supplementary material for: Composite adverse outcomes in obstetric studies: a systematic review
Source: PubMed Central journal article supplement (PMC7863533; doi:10.1186/s12884-021-03588-w), 2021-02-05
Supplement: 12884_2021_3588_MOESM4_ESM.pdf [file 12884_2021_3588_MOESM4_ESM.pdf]

#### Supplementary Data 4: Condition-specific maternal composite outcomes

| Condition-specific morbidity                | Infectious morbidity (n=6)                                                                                                                                                                                                                                                                                                                                                                            | Bleeding (n=2)                                                                                                                                                                                                  | Respiratory morbidity (n=1)                                                                                                                      | Perineal trauma (n=1)                                                                       | Labour (n=1)                                                                                                                                                                                              |
|---------------------------------------------|-------------------------------------------------------------------------------------------------------------------------------------------------------------------------------------------------------------------------------------------------------------------------------------------------------------------------------------------------------------------------------------------------------|-----------------------------------------------------------------------------------------------------------------------------------------------------------------------------------------------------------------|--------------------------------------------------------------------------------------------------------------------------------------------------|---------------------------------------------------------------------------------------------|-----------------------------------------------------------------------------------------------------------------------------------------------------------------------------------------------------------|
| <b>Components (frequency of occurrence)</b> | <ul style="list-style-type: none"> <li>• Endometritis (5)</li> <li>• Wound infection (3)</li> <li>• Pneumonia (2)</li> <li>• Death</li> <li>• WHO Stage IV HIV</li> <li>• Urinary Tract Infection</li> <li>• Sepsis</li> <li>• Septic Thrombophlebitis</li> <li>• Pelvic Abscess</li> <li>• Pyelonephritis</li> <li>• Meningitis</li> <li>• Chorioamnionitis</li> <li>• CD4 count &gt; 200</li> </ul> | <ul style="list-style-type: none"> <li>• 4 gm/l drop in haemoglobin</li> <li>• Transfusion of at least 2 units &lt; 48 hours</li> <li>• 500ml of blood loss</li> <li>• Additional use of uterotonics</li> </ul> | <ul style="list-style-type: none"> <li>• Pulmonary oedema</li> <li>• Chest pain</li> <li>• Shortness of breath</li> <li>• Hypotension</li> </ul> | <ul style="list-style-type: none"> <li>• Episiotomy</li> <li>• 2/3/4 lacerations</li> </ul> | <ul style="list-style-type: none"> <li>• Caesarean section</li> <li>• Operative vaginal delivery</li> <li>• Induction of Labour</li> <li>• Augmentation</li> <li>• Pharmacological pain relief</li> </ul> |

WHO, World Health Organization; \* where there are no numbers in parentheses, n=1
